# Supplementary material for: The effects of brodifacoum cereal bait pellets on early life stages of the rice coral Montipora capitata
Source: PeerJ. 2022 Aug 16;10:e13877. doi: 10.7717/peerj.13877 (PMC9390324; doi:10.7717/peerj.13877)
Supplement: Supplemental Information 1 — Fertilization success (%) of M. capitata gametes in brodifacoum in DMSO, inert pellet solutions, and brodifacoum pellet solutions. [file peerj-10-13877-s001.xlsx]

## Sheet: S.1
Supplementary Table 1. Fertilization success (%) of M. capitata gametes in brodifacoum in DMSO, inert pellet solutions, and brodifacoum pellet solutions.
	0.5 micron filtered seawater control	1 ppb Brodifacoum in Pellet	10 ppb Brodifacoum in Pellet	100 ppb Brodifacoum in Pellet	0.04 grams inert pellet	0.4 grams inert pellet	4 grams Inert pellet	DMSO	1 ppb Brodifacoum in DMSO	10 ppb Brodifacoum in DMSO	50 ppb Brodifacoum in DMSO	100 ppb Brodifacoum in DMSO	DATE
	90	90.9	92.3	0	90	90	10	100	90.9	91.67	--	90.9	2021-06-09
	100	91.66	42.85	0	80	30	0	90	76.92	100	--	80	2021-06-09
	90	100	61.54	10	100	60	10	100	93.33	80	--	100	2021-06-09
	60	50	76.92	9.1	100	27.27	10	91.67	90	90	--	90	2021-06-09
	100	71.48	77.77	10	80	90	10	77.77	90	90	--	90	2021-06-09
	100	100	40	10	70	50	0	85.71	60	20	--	90	2021-06-09
	90	100	90.9	0	100	60	20	90	100	100	--	100	2021-06-07
	100	100	60	0	70	60	10	90.9	100	90	--	60	2021-06-07
	90	100	70	10	80	72.72	0	92.31	90	90.9	--	90	2021-06-07
	100	100	90.9	9.1	90	80	0	90.9	90	91.67	--	90	2021-06-07
	100	20	70	9.1	90	60	0	91.67	80	80	--	81.82	2021-06-07
	80	100	100	0	10	70	0	91.67	90.9	81.82	--	90	2021-06-07
	100	90	30	0	80	50	0	90	100	100	--	70	2022-07-09
	90	100	80	0	80	80	20	100	100	100	--	100	2021-07-09
	100	90	80	0	60	50	0	90	90	100	100	20	2021-07-10
	100	100	80	0	60	10	0	90	100	100	100	80	2021-07-10
	80	40	10	0	90	10	0	100	90	100	0	10	2021-07-10
	100	40	10	0	90	60	0	90	100	0	80	20	2021-07-10
	90	90	0	0	100	20	0	90	100	100	80	20	2021-07-10
	100	80	0	0	40	20	0	100	100	100	100	40	2021-07-10
mean	93	82.702	58.159	3.365	78	52.4995	4.5	92.13	91.6025	85.303	76.6667	70.636
median	100	91.28	70	0	80	60	0	90.9	90.9	91.67	90	85.91
standard deviation	10.311	24.9012	32.6736	4.71261	22.3842	25.348	6.86333	5.58457	10.085	26.8838	38.8158	30.7523
	100
	100
