# Supplementary material for: The effects of brodifacoum cereal bait pellets on early life stages of the rice coral Montipora capitata
Source: PeerJ. 2022 Aug 16;10:e13877. doi: 10.7717/peerj.13877 (PMC9390324; doi:10.7717/peerj.13877)
Supplement: Supplemental Information 2 — Fertilization success (%) of M. capitata gametes in brodifacoum in DMSO, inert pellet solutions, and brodifacoum pellet solutions. [file peerj-10-13877-s002.xlsx]

## Sheet: Sheet1
Supplementary Table 2. Larval Survival by treatment after 24, 48, and 72 hours of exposure to brodifaocum in DMSO, inert pellet solutions, and brodifaocum pellet solutions.
Time Point	0.5 micron filtered seawater control	1 ppb Brodifacoum in Pellet	10 ppb Brodifacoum in Pellet	100 ppb Brodifacoum in Pellet	0.04 grams inert pellet	0.4 grams inert pellet	4 grams Inert pellet	DMSO	1 ppb Brodifacoum in DMSO	10 ppb Brodifacoum in DMSO	100 ppb Brodifacoum in DMSO
24 hours	90	100	100	90	100	100	100	100	90	100	90
24 hours	100	100	100	90	100	100	100	100	100	90	90
24 hours	80	100	100	90	100	100	90	100	90	90	80
24 hours	100	100	100	60	100	100	100	100	100	100	90
24 hours	90	100	100	90	90	100	100	100	90	90	100
24 hours	100	70	80	10	100	90	10
24 hours	100	100	100	50	100	80	60
24 hours	90	100	80	40	100	100	100
24 hours	100	90	100	10	100	100	80
24 hours	90	100	90	50	100	100	80
48 hours	100	100	90	80	100	100	80	80	100	100	90
48 hours	90	90	100	80	100	70	50	100	100	70	90
48 hours	80	90	100	50	100	100	50	100	90	100	80
48 hours	90	100	70	100	90	100	60	80	100	90	90
48 hours	100	100	80	70	80	90	60	100	90	80	100
48 hours	100	100	40	0	100	60	10
48 hours	80	80	70	0	100	80	70
48 hours	90	100	10	0	90	80	60
48 hours	100	100	70	0	100	90	60
48 hours	100	90	30	0	90	60	40
72 hours	100	100	100	80	100	100	60	80	90	100	90
72 hours	100	100	90	70	90	100	40	90	100	70	90
72 hours	90	80	100	50	90	90	50	80	90	90	80
72 hours	70	80	70	50	100	100	60	80	100	90	90
72 hours	100	100	90	20	90	100	50	90	90	80	90
72 hours	100	90	30	0	90	40	0
72 hours	100	90	20	0	90	10	60
72 hours	90	90	0	0	100	20	60
72 hours	80	70	0	0	80	80	50
72 hours	90	90	10	0	90	40	60
24 hours mean	94	96	95	58	99	97	82	100	94	94	90
48 hours mean	93	95	66	38	95	83	54	92	96	88	90
72 hours mean	92	89	50.1	27	92	68	49	84	94	86	88
